# Supplementary material
Source: ML conference proceedings conference paper supplement (https://openreview.net/forum?id=oioB7Te7Bo)
Supplement: supplementary_material [file attachment]

## Sheet: 0
PAPER TITLE
PAPER URL
CORPORATE AFFILIATION, IF ANY
FUNDING AGENCIES, IF ANY
JUSTIFICATION							General																								Performance												Advances understanding in the field
Document the justificatory steps and the values in them.	Quotation	Section		Brief summary	Additional Notes	Starred example?	Novelty	Simplicity	Generalization	Flexibility/Extensibility	Robustness	Realistic output	Formal description/analysis	Theoretical guarantees	Approximation	Quantitative evidence (e.g. experiments)	Qualitative evidence (e.g. examples)	Scientific methodology	Controllability (of model owner)	Human-like mechanism	Low cost	Large scale	Promising	Generality	Principled	Certainty	Exactness	Preciseness	Concreteness	Automatic	Performance	Accuracy	Avoiding train/test discrepancy	State-of-the-art	Efficiency	Reduced training time	Memory efficiency	Data efficiency	Label efficiency (reduced need for labeled data)	Energy efficiency	Effectiveness	Successful	Building on classic work	Building on recent work	Unifying ideas or integrating components	Identifying limitations	Critique	Understanding (for researchers)	Improvement
Specific Instructions: State each explicit step in the chain. Also state each implict step, which are the assumptions you would be making to make a valid argument. Mark the explicit values in them. e = explicit evidence of value; i = implicit evidence of value; d = definition of value given
Is the societal need/justification for this paper well-defended? 0=Doesn't rigorously justify how it achieves internal goal 1=Justifies how it achieves internal goal but no mention of any societal need 2=States but does not justify how it connect to a societal need 3=States and somewhat justifies how it connects to a societal need 4=States and rigorously justifies how it connects to a a societal …
At a high level, what task does this paper say it is engaged in? (Classification, Prediction, Generation, Understanding, Defenses, Transparency, Something else?)
Do they mention a need of ML researchers? (e=explicit, i=implicit)
Do they mention a need of tech companies? (e=explicit, i=implicit)
Do they mention a need of data sources? (e=explicit, i=implicit)
Do they mention a need of users? (e=explicit, i=implicit)
Do they mention a need of someone else?
UPLIFTED VALUES
							General																								Performance												Advances understanding in the field
Document all uplifted values	Quotation	Section			Additional Notes	Starred example?	Novelty	Simplicity	Generalization	Flexibility/Extensibility	Robustness	Realistic output	Formal description/analysis	Theoretical guarantees	Approximation	Quantitative evidence (e.g. experiments)	Qualitative evidence (e.g. examples)	Scientific methodology	Controllability (of model owner)	Human-like mechanism	Low cost	Large scale	Promising	Generality	Principled	Certainty	Exactness	Preciseness	Concreteness	Automatic	Performance	Accuracy	Avoiding train/test discrepancy	State-of-the-art	Efficiency	Reduced training time	Memory efficiency	Data efficiency	Label efficiency (reduced need for labeled data)	Energy efficiency	Effectiveness	Successful	Building on classic work	Building on recent work	Unifying ideas or integrating components	Identifying limitations	Critique	Understanding (for researchers)	Improvement
Specific Instructions: In the abstract, intro, discussion, and conclusion, go sentence by sentence. If a sentence contains any explicit or implicit values, mark them. e = explicit evidence of value; i = implicit evidence of value; d = definition of value given
							0	0	0	0	0	0	0	0	0	0	0	0	0	0	0	0	0	0	0	0	0	0	0	0	0	0	0	0	0	0	0	0	0	0	0	0	0	0	0	0	0	0	0
DISCUSSION OF NEGATIVE POTENTIAL
To what extent does the paper engage with negative potential? 0=Doesn't mention negative potential 1=Only mentions negative potential 2=Discusses negative potential 3=Deepens our understanding of negative potential
If >0, does the paper call for technical improvement or questioning?
[truncated: 42 more columns]

## Sheet: 1
PAPER TITLE	Evaluation Methods for Topic Models
PAPER URL	http://dirichlet.net/pdf/wallach09evaluation.pdf
CORPORATE AFFILIATION, IF ANY
FUNDING AGENCIES, IF ANY	Center for Intelligent Information Retrieval and CIA, NSA & NSF under NSF grant #IIS-0326249.
JUSTIFICATION							General																								Performance												Advances understanding in the field
Document the justificatory steps and the values in them.	Quotation	Section		Brief summary	Additional Notes	Starred example?	Novelty	Simplicity	Generalization	Flexibility/Extensibility	Robustness	Realistic output	Formal description/analysis	Theoretical guarantees	Approximation	Quantitative evidence (e.g. experiments)	Qualitative evidence (e.g. examples)	Scientific methodology	Controllability (of model owner)	Human-like mechanism	Low cost	Large scale	Promising	Generality	Principled	Certainty	Exactness	Preciseness	Concreteness	Automatic	Performance	Accuracy	Avoiding train/test discrepancy	State-of-the-art	Efficiency	Reduced training time	Memory efficiency	Data efficiency	Label efficiency (reduced need for labeled data)	Energy efficiency	Effectiveness	Successful	Building on classic work	Building on recent work	Unifying ideas or integrating components	Identifying limitations	Critique	Understanding (for researchers)	Improvement
Specific Instructions: State each explicit step in the chain. Also state each implict step, which are the assumptions you would be making to make a valid argument. Mark the explicit values in them. e = explicit evidence of value; i = implicit evidence of value; d = definition of value given	While exact computation of this probability is in- tractable, several estimators for this prob- ability have been used in the topic model- ing literature, including the harmonic mean method and empirical likelihood method.	Introduction																									e																	i
	Statistical topic modeling is an increasingly useful tool for analyzing large unstructured text collections.	Introduction																				e
	To date, however, there have not been any papers speciﬁcally addressing the issue of evaluating topic models.	Introduction																																										i
	Evaluation is an important issue: the unsupervised nature of topic models makes model se- lection diﬃcult.	Introduction
	For some applications there may be extrinsic tasks, such as information retrieval or docu- ment classiﬁcation, for which performance can be eval- uated.	Introduction																													e
	However, there is a need for a universal method that measures the generalization capability of a topic model in a way that is accurate, computationally eﬃ- cient, and independent of any speciﬁc application.	Introduction							e	i																						e			e
Is the societal need/justification for this paper well-defended? 0=Doesn't rigorously justify how it achieves internal goal 1=Justifies how it achieves internal goal but no mention of any societal need 2=States but does not justify how it connect to a societal need 3=States and somewhat justifies how it connects to a societal need 4=States and rigorously justifies how it connects to a a societal …				1
At a high level, what task does this paper say it is engaged in? (Classification, Prediction, Generation, Understanding, Defenses, Transparency, Something else?)				Evaluation
Do they mention a need of ML researchers? (e=explicit, i=implicit)				e
Do they mention a need of tech companies? (e=explicit, i=implicit)				no
Do they mention a need of data sources? (e=explicit, i=implicit)				no
Do they mention a need of users? (e=explicit, i=implicit)				no
Do they mention a need of someone else?				no
UPLIFTED VALUES
							General																								Performance												Advances understanding in the field
Document all uplifted values	Quotation	Section			Additional Notes	Starred example?	Novelty	Simplicity	Generalization	Flexibility/Extensibility	Robustness	Realistic output	Formal description/analysis	Theoretical guarantees	Approximation	Quantitative evidence (e.g. experiments)	Qualitative evidence (e.g. examples)	Scientific methodology	Controllability (of model owner)	Human-like mechanism	Low cost	Large scale	Promising	Generality	Principled	Certainty	Exactness	Preciseness	Concreteness	Automatic	Performance	Accuracy	Avoiding train/test discrepancy	State-of-the-art	Efficiency	Reduced training time	Memory efficiency	Data efficiency	Label efficiency (reduced need for labeled data)	Energy efficiency	Effectiveness	Successful	Building on classic work	Building on recent work	Unifying ideas or integrating components	Identifying limitations	Critique	Understanding (for researchers)	Improvement
Specific Instructions: In the abstract, intro, discussion, and conclusion, go sentence by sentence. If a sentence contains any explicit or implicit values, mark them. e = explicit evidence of value; i = implicit evidence of value; d = definition of value given	A natural evaluation metric for statistical topic models is the probability of held-out documents given a trained model.	Introduction
	While exact computation of this probability is in- tractable, several estimators for this prob- ability have been used in the topic model- ing literature, including the harmonic mean method and empirical likelihood method.	Introduction																									e																	i
	In this paper, we demonstrate experimentally that commonly-used methods are unlikely to accurately estimate the probability of held- out documents, and propose two alternative methods that are both accurate and eﬃcient.	Introduction					i								i	i																e			e
	Statistical topic modeling is an increasingly useful tool for analyzing large unstructured text collections.	Introduction																				e
	There is a signiﬁcant body of work introducing and developing sophisticated topic models and their appli- cations.	Introduction
	To date, however, there have not been any papers speciﬁcally addressing the issue of evaluating topic models.	Introduction																																										i
	Evaluation is an important issue: the unsupervised nature of topic models makes model se- lection diﬃcult.	Introduction
	For some applications there may be extrinsic tasks, such as information retrieval or docu- ment classiﬁcation, for which performance can be eval- uated.	Introduction																													e
	However, there is a need for a universal method that measures the generalization capability of a topic model in a way that is accurate, computationally eﬃ- cient, and independent of any speciﬁc application.	Introduction							e	i																						e			e
	In this paper we consider only the simplest topic model, latent Dirichlet allocation (LDA), and compare a number of methods for estimating the probability of held-out documents given a trained model.	Introduction						i
	Most of the methods presented, however, are applicable to more complicated topic models.	Introduction								i
	In addition to com- paring evaluation methods that are currently used in the topic modeling literature, we propose several al- ternative methods.	Introduction													i																													i
	We present empirical results on synthetic and real-world data sets showing that the currently-used estimators are less accurate and have higher variance than the proposed new estimators.	Introduction														i																i
	The evaluation methods currently used in the topic modeling community, including the harmonic mean method, importance sampling from P(θ | αm), and document completion methods, are generally inaccurate.	Discussion																														i
	Even if these methods do result in a correct ranking of different models, the relative advantage of one model over another may be incorrectly represented.	Discussion
	Most of the evaluation methods described in this paper extend readily to more complicated topic models— including non-parametric versions based on hierarchical Dirichlet processes (Teh et al., 2006)—since they only require a MCMC algorithm for sampling the latent topic assignments z for each document and a way of evaluating probability P(w | z, Φ, αm).	Discussion								i																																						i
	Importance sampling from P(θ | αm) is not obviously directly applicable to non-parametric topic models, however.	Discussion
	Estimating the probability of held-out documents provides a clear, interpretable metric for evaluating the performance of topic models relative to other topicbased models as well as to other non-topic-based generative models.	Discussion						i																							e																	e
	We provide empirical evidence that several recently-used methods for estimating the probability of held-out documents are inaccurate and can change the results of model comparison.	Discussion														e																e												i
	In contrast, the Chib-style estimator and “left-to-right” algorithm presented in this paper provide a clear methodology for accurately assessing and selecting topic models.	Discussion						i																								e
							1	3	1	3	0	0	0	0	2	3	0	0	0	0	0	1	0	0	0	0	1	0	0	0	2	6	0	0	2	0	0	0	0	0	0	0	0	4	0	0	0	2	0
DISCUSSION OF NEGATIVE POTENTIAL
To what extent does the paper engage with negative potential? 0=Doesn't mention negative potential 1=Only mentions negative potential 2=Discusses negative potential 3=Deepens our understanding of negative potential				0
If >0, does the paper call for technical improvement or questioning?
[truncated: 42 more columns]

## Sheet: 2
PAPER TITLE	Learning with Structured Sparsity
PAPER URL	https://www.jmlr.org/papers/volume12/huang11b/huang11b.pdf
CORPORATE AFFILIATION, IF ANY	none stated
FUNDING AGENCIES, IF ANY	not clearly disclosed
JUSTIFICATION							General																								Performance												Advances understanding in the field
Document the justificatory steps and the values in them.	Quotation	Section		Brief summary	Additional Notes	Starred example?	Novelty	Simplicity	Generalization	Flexibility/Extensibility	Robustness	Realistic output	Formal description/analysis	Theoretical guarantees	Approximation	Quantitative evidence (e.g. experiments)	Qualitative evidence (e.g. examples)	Scientific methodology	Controllability (of model owner)	Human-like mechanism	Low cost	Large scale	Promising	Generality	Principled	Certainty	Exactness	Preciseness	Concreteness	Automatic	Performance	Accuracy	Avoiding train/test discrepancy	State-of-the-art	Efficiency	Reduced training time	Memory efficiency	Data efficiency	Label efficiency (reduced need for labeled data)	Energy efficiency	Effectiveness	Successful	Building on classic work	Building on recent work	Unifying ideas or integrating components	Identifying limitations	Critique	Understanding (for researchers)	Improvement
Specific Instructions: State each explicit step in the chain. Also state each implict step, which are the assumptions you would be making to make a valid argument. Mark the explicit values in them. e = explicit evidence of value; i = implicit evidence of value; d = definition of value given	This paper investigates a learning formulation called structured sparsity, which is a natural exten- sion of the standard sparsity concept in statistical learning and compressive sensing.	Abstract
	By allowing arbitrary structures on the feature set, this concept generalizes the group sparsity idea that has become popular in recent years.	Abstract								i
	We are interested in the sparse learning problem under the ﬁxed design condition.	Introduction
Is the societal need/justification for this paper well-defended? 0=Doesn't rigorously justify how it achieves internal goal 1=Justifies how it achieves internal goal but no mention of any societal need 2=States but does not justify how it connect to a societal need 3=States and somewhat justifies how it connects to a societal need 4=States and rigorously justifies how it connects to a a societal …				1
At a high level, what task does this paper say it is engaged in? (Classification, Prediction, Generation, Understanding, Defenses, Transparency, Something else?)				Theory / something else??
Do they mention a need of ML researchers? (e=explicit, i=implicit)				not really?
Do they mention a need of tech companies? (e=explicit, i=implicit)				no
Do they mention a need of data sources? (e=explicit, i=implicit)				no
Do they mention a need of users? (e=explicit, i=implicit)				no
Do they mention a need of someone else?
UPLIFTED VALUES
							General																								Performance												Advances understanding in the field
Document all uplifted values	Quotation	Section			Additional Notes	Starred example?	Novelty	Simplicity	Generalization	Flexibility/Extensibility	Robustness	Realistic output	Formal description/analysis	Theoretical guarantees	Approximation	Quantitative evidence (e.g. experiments)	Qualitative evidence (e.g. examples)	Scientific methodology	Controllability (of model owner)	Human-like mechanism	Low cost	Large scale	Promising	Generality	Principled	Certainty	Exactness	Preciseness	Concreteness	Automatic	Performance	Accuracy	Avoiding train/test discrepancy	State-of-the-art	Efficiency	Reduced training time	Memory efficiency	Data efficiency	Label efficiency (reduced need for labeled data)	Energy efficiency	Effectiveness	Successful	Building on classic work	Building on recent work	Unifying ideas or integrating components	Identifying limitations	Critique	Understanding (for researchers)	Improvement
Specific Instructions: In the abstract, intro, discussion, and conclusion, go sentence by sentence. If a sentence contains any explicit or implicit values, mark them. e = explicit evidence of value; i = implicit evidence of value; d = definition of value given	This paper investigates a learning formulation called structured sparsity, which is a natural exten- sion of the standard sparsity concept in statistical learning and compressive sensing.	Abstract
	By allowing arbitrary structures on the feature set, this concept generalizes the group sparsity idea that has become popular in recent years.	Abstract								i
	A general theory is developed for learning with structured spar- sity, based on the notion of coding complexity associated with the structure.	Abstract											i	i
	It is shown that if the coding complexity of the target signal is small, then one can achieve improved performance by using coding complexity regularization methods, which generalize the standard sparse regu- larization.	Abstract												i																	e
	Moreover, a structured greedy algorithm is proposed to efﬁciently solve the structured sparsity problem.	Abstract											i																						e
	It is shown that the greedy algorithm approximately solves the coding complexity optimization problem under appropriate conditions.	Abstract												i	i
	Experiments are included to demonstrate the advantage of structured sparsity over standard sparsity on some real applications.	Abstract														e
	We are interested in the sparse learning problem under the ﬁxed design condition.	Introduction
	Consider a fixed set of p basis vectors {x1,...,xp} where xj ∈ R n for each j.	Introduction
	Here, n is the sample size. Denote by X the n × p data matrix, with column j of X being xj .	Introduction
	Given a random observation y = [y1,...,yn] ∈ R n that depends on an underlying coefficient vector ¯β ∈ R p , we are interested in the problem of estimating ¯β under the assumption that the target coefficient ¯β is sparse. T	Introduction
	Throughout the paper, we consider fixed design only.	Introduction
	That is, we assume X is fixed, and randomization is with respect to the noise in the observation y.	Introduction
	We consider the situation that the true mean of the observation Ey can be approximated by a sparse linear combination of the basis vectors.	Introduction													e
	That is, there exists a target vector ¯β ∈ R p such that either Ey = X ¯β or Ey−X ¯β is small.	Introduction
	Moreover, we assume that ¯β is sparse.	Introduction
	Define the support of a vector β ∈ R p as supp(β) = { j : βj 6= 0}, and kβk0 = |supp(β)|.	Introduction
	A natural method for sparse learning is L0 regularization: ˆβL0 = arg min β∈Rp Qˆ(β) subject to kβk0 ≤ s, (1) where s is the desired sparsity.	Introduction												i	i
	For simplicity, unless otherwise stated, the objective function considered throughout this paper is the least squares loss Qˆ(β) = kXβ−yk 2 2 , where k · k2 denotes the Euclidean norm.	Introduction
	Since this optimization problem is generally NP-hard, in practice, one often considers approximate solutions	Introduction
	A standard approach is convex relaxation of L0 regularization to L1 regularization, often referred to as Lasso (Tibshirani, 1996).	Introduction
	Another commonly used approach is greedy algo- rithms, such as the orthogonal matching pursuit (OMP) (Tropp and Gilbert, 2007).	Introduction
	In practical applications, one often knows a structure on the coefﬁcient vector ¯b in addition to sparsity.	Introduction
	For example, in group sparsity, one assumes that variables in the same group tend to be zero or nonzero simultaneously.	Introduction															i
	The purpose of this paper is to study the more general estimation problem under structured sparsity.	Introduction
	If meaningful structures exist, we show that one can take advan- tage of such structures to improve the standard sparse learning.	Introduction
	Speciﬁcally, we study the following natural extension of L0 regularization to structured sparsity problems.	Introduction
	It replaces the L0 constraint in (1) by a more general term c(b ), which we call coding complexity.	Introduction
	The precise deﬁnition will be given later in Section 2, and some concrete examples will be given later in Section 4.	Introduction											i
	The optimization of either (2) or (3) is generally hard.	Introduction												i
	For related problems, there are two com- mon approaches to alleviate this difﬁculty.	Introduction
	One is convex relaxation (L1 regularization to replace L0 regularization for standard sparsity); the other is forward greedy selection (also called orthogonal matching pursuit or OMP).	Introduction								i				e																	e
	We do not know any extensions of L1 regularization like convex relax- ation methods that can handle general structured sparsity formulations with provable performance guarantees.	Introduction
	In particular, the theoretical analysis in our companion paper (Huang and Zhang, 2010) for group Lasso fails to yield meaningful bounds for more complex convex relaxation methods that are proposed for general structured sparsity formulations considered in this paper.	Introduction											i	i																																i
	For this reason, we present an extension of the standard greedy OMP algorithm that can be applied to general struc- tured sparsity problems, and more importantly, meaningful sparse recovery bounds can be obtained for this algorithm.	Introduction																																										i
	We call the resulting procedure structured greedy algorithm or StructOMP, which approximately solves (2).	Introduction													i
	This paper develops a theory for structured sparsity where prior knowledge allows us to prefer certain sparsity patterns to others.	Discussion											i
	The general framework established in this paper includes the recently popularized group sparsity idea as a special case	Discussion																																										i	i
	In structured sparsity, the complexity of learning is measured by the coding complexity c( ¯β) ≤ k ¯βk0 +cl(supp( ¯β)) instead of k ¯βk0 ln p which determines the complexity in standard sparsity.	Discussion											i	i
	Using this notation, a theory parallel to that of the standard sparsity is developed.	Discussion											i
	The theory shows that if the coding length cl(supp( ¯β)) is small for a target coefficient vector ¯β, then the complexity of learning ¯β can be significantly smaller than the corresponding complexity in standard sparsity.	Discussion											i	i
	Experimental results demonstrate that significant improvements can be obtained on some real problems that have natural structures	Discussion														i
	The structured greedy algorithm presented in this paper is the first efficient algorithm proposed to handle the general structured sparsity learning	Discussion					e																												e
	It is shown that the algorithm is effective under appropriate conditions. F	Discussion																																							e
	Future work include additional computationally efficient methods such as convex relaxation methods (e.g. L1 regularization for standard sparsity, and group Lasso for strong group sparsity) and backward greedy strategies to improve the forward greedy method considered in this paper	Discussion																																	e
							1	0	0	2	0	0	8	9	4	2	1	0	0	0	0	0	0	0	0	0	0	0	0	0	2	0	0	0	3	0	0	0	0	0	1	0	0	2	1	1	0	0	0
DISCUSSION OF NEGATIVE POTENTIAL
To what extent does the paper engage with negative potential? 0=Doesn't mention negative potential 1=Only mentions negative potential 2=Discusses negative potential 3=Deepens our understanding of negative potential				0
If >0, does the paper call for technical improvement or questioning?
[truncated: 42 more columns]

## Sheet: 3
PAPER TITLE	Bayesian Probabilistic Matrix Factorization using Markov Chain Monte Carlo
PAPER URL	http://icml2008.cs.helsinki.fi/papers/600.pdf
CORPORATE AFFILIATION, IF ANY
FUNDING AGENCIES, IF ANY	NSERC
JUSTIFICATION							General																								Performance												Advances understanding in the field
Document the justificatory steps and the values in them.	Quotation	Section		Brief summary	Additional Notes	Starred example?	Novelty	Simplicity	Generalization	Flexibility/Extensibility	Robustness	Realistic output	Formal description/analysis	Theoretical guarantees	Approximation	Quantitative evidence (e.g. experiments)	Qualitative evidence (e.g. examples)	Scientific methodology	Controllability (of model owner)	Human-like mechanism	Low cost	Large scale	Promising	Generality	Principled	Certainty	Exactness	Preciseness	Concreteness	Automatic	Performance	Accuracy	Avoiding train/test discrepancy	State-of-the-art	Efficiency	Reduced training time	Memory efficiency	Data efficiency	Label efficiency (reduced need for labeled data)	Energy efficiency	Effectiveness	Successful	Building on classic work	Building on recent work	Unifying ideas or integrating components	Identifying limitations	Critique	Understanding (for researchers)	Improvement
Specific Instructions: State each explicit step in the chain. Also state each implict step, which are the assumptions you would be making to make a valid argument. Mark the explicit values in them. e = explicit evidence of value; i = implicit evidence of value; d = definition of value given	However, un- less the regularization parameters are tuned carefully, this approach is prone to overﬁt- ting because it ﬁnds a single point estimate of the parameters.	Abstract
	In practice, MCMC methods are rarely used on large- scale problems because they are perceived to be very slow by practitioners.	Introduction																				e
Is the societal need/justification for this paper well-defended? 0=Doesn't rigorously justify how it achieves internal goal 1=Justifies how it achieves internal goal but no mention of any societal need 2=States but does not justify how it connect to a societal need 3=States and somewhat justifies how it connects to a societal need 4=States and rigorously justifies how it connects to a a societal …				1
At a high level, what task does this paper say it is engaged in? (Classification, Prediction, Generation, Understanding, Defenses, Transparency, Something else?)				Understanding(?)
Do they mention a need of ML researchers? (e=explicit, i=implicit)				no
Do they mention a need of tech companies? (e=explicit, i=implicit)				no
Do they mention a need of data sources? (e=explicit, i=implicit)				no
Do they mention a need of users? (e=explicit, i=implicit)				no
Do they mention a need of someone else?				no
UPLIFTED VALUES
							General																								Performance												Advances understanding in the field
Document all uplifted values	Quotation	Section			Additional Notes	Starred example?	Novelty	Simplicity	Generalization	Flexibility/Extensibility	Robustness	Realistic output	Formal description/analysis	Theoretical guarantees	Approximation	Quantitative evidence (e.g. experiments)	Qualitative evidence (e.g. examples)	Scientific methodology	Controllability (of model owner)	Human-like mechanism	Low cost	Large scale	Promising	Generality	Principled	Certainty	Exactness	Preciseness	Concreteness	Automatic	Performance	Accuracy	Avoiding train/test discrepancy	State-of-the-art	Efficiency	Reduced training time	Memory efficiency	Data efficiency	Label efficiency (reduced need for labeled data)	Energy efficiency	Effectiveness	Successful	Building on classic work	Building on recent work	Unifying ideas or integrating components	Identifying limitations	Critique	Understanding (for researchers)	Improvement
Specific Instructions: In the abstract, intro, discussion, and conclusion, go sentence by sentence. If a sentence contains any explicit or implicit values, mark them. e = explicit evidence of value; i = implicit evidence of value; d = definition of value given	Low-rank matrix approximation methods provide one of the simplest and most eﬀective approaches to collaborative ﬁltering.	Abstract						e																																	e
	Such models are usually ﬁtted to data by ﬁnding a MAP estimate of the model parameters, a procedure that can be performed eﬃciently even on very large datasets.	Abstract																				e													e
	However, un- less the regularization parameters are tuned carefully, this approach is prone to overﬁt- ting because it ﬁnds a single point estimate of the parameters.	Abstract
	In this paper we present a fully Bayesian treatment of the Probabilistic Matrix Factorization (PMF) model in which model capacity is controlled automatically by integrating over all model parameters and hyperparameters.	Abstract																												e
	We show that Bayesian PMF models can be eﬃciently trained us- ing Markov chain Monte Carlo methods by applying them to the Netﬂix dataset, which consists of over 100 million movie ratings.	Abstract																				e													e
	The resulting models achieve signiﬁcantly higher prediction accuracy than PMF models trained using MAP estimation.	Abstract																														e
	Factor-based models have been used extensively in the domain of collaborative ﬁltering for modelling user preferences.	Introduction
	The idea behind such models is that pref- erences of a user are determined by a small number of unobserved factors.	Introduction
	In a linear factor model, a user’s rating of an item is modelled by the inner product of an item factor vector and a user factor vector.	Introduction
	This means that the N × M preference matrix of ratings that N users assign to M movies is modeled by the product of an D × N user coeﬃcient matrix U and a D×M factor matrix V (Rennie & Srebro, 2005; Srebro	Introduction
	Training such a model amounts to ﬁnding the best rank-D approximation to the observed N × M target matrix R under the given loss function.	Introduction
	A variety of probabilistic factor-based models have been proposed (Hofmann, 1999; Marlin, 2004; Marlin & Zemel, 2004; Salakhutdinov & Mnih, 2008).	Introduction																																									i
	In these models factor variables are assumed to be marginally independent while rating variables are assumed to be conditionally independent given the factor variables.	Introduction
	The main drawback of such models is that inferring the posterior distribution over the factors given the ratings is intractable.	Introduction																																												i
	Many of the existing methods resort to performing MAP estimation of the model pa- rameters.	Introduction
	Training such models amounts to maximiz- ing the log-posterior over model parameters and can be done very eﬃciently even on very large datasets.	Introduction																				e													e
	In practice, we are usually interested in predicting rat- ings for new user/movie pairs rather than in estimat- ing model parameters.	Introduction
	This view suggests taking a Bayesian approach to the problem which involves in- tegrating out the model parameters.	Introduction																																										i
	In this paper, we describe a fully Bayesian treatment of the Probabilis- tic Matrix Factorization (PMF) model which has been recently applied to collaborative ﬁltering (Salakhutdi- nov & Mnih, 2008).	Introduction
	The distinguishing feature of our work is the use of Markov chain Monte Carlo (MCMC) methods for approximate inference in this model.	Introduction					e
	In practice, MCMC methods are rarely used on large- scale problems because they are perceived to be very slow by practitioners.	Introduction																				e
	In this paper we show that MCMC can be successfully applied to the large, sparse, and very imbalanced Netﬂix dataset, containing over 100 million user/movie ratings.	Introduction																																								e
	We also show that it signiﬁcantly increases the model’s predictive accuracy, especially for the infrequent users, compared to the standard PMF models trained using MAP with regu- larization parameters that have been carefully tuned on the validation set.	Introduction																														e
	Previous applications of Bayesian matrix factorization methods to collaborative ﬁltering (Lim & Teh, 2007; Raiko et al., 2007) have used variational approximations for performing inference.	Introduction																																										i
	These methods at- tempt to approximate the true posterior distribution by a simpler, factorized distribution under which the user factor vectors are independent of the movie factor vectors.	Introduction						e
	The consequence of this assumption is that that the variational posterior distributions over the factor vectors is a product of two multivariate Gaus- sians: one for the viewer factor vectors and one for the movie factor vectors.	Introduction
	This assumption of indepen- dence between the viewer and movie factors seems un- reasonable, and, as our experiments demonstrate, the distributions over factors in such models turn out to be non-Gaussian.	Introduction
	This conclusion is supported by the fact that the Bayesian PMF models outperform their MAP trained counterparts by a much larger margin than the variationally trained models do.	Introduction																													e
	We have presented a fully Bayesian treatment of Probabilistic Matrix Factorization by placing hyperpriors over the hyperparameters and using MCMC methods to perform approximate inference.	Conclusion
	We have also demonstrated that Bayesian PMF models can be successfully applied to a large dataset containing over 100 million movie ratings, and achieve significantly higher predictive accuracy compared to the MAPtrained PMF models with carefully tuned regularization parameters.	Conclusion																				e										e										e
	An additional advantage of using a Bayesian model is that it provides a predictive distribution instead of just a single number, allowing the confidence in the prediction to be quantified and taken into account when making recommendations using the model.	Conclusion
	Using MCMC instead of variational methods for approximate inference in Bayesian matrix factorization models leads to much larger improvements over the MAP trained models, which suggests that the assumptions made by the variational methods about the structure of the posterior are not entirely reasonable.	Conclusion																																														i
	This conclusion is confirmed by inspecting the empirical distribution of the samples from the posterior, which appears to be significantly non-Gaussian.	Conclusion
	A major problem of MCMC methods is that it is hard to determine when the Markov chain has converged to the desired distribution.	Conclusion																																														i
	In practice, we have to rely on rules of thumb to diagnose convergence, which means that there is a risk of using samples from a distribution that differs from the true posterior distribution, potentially leading to suboptimal predictions.	Conclusion																																														i
	Our results show that this problem is not a sufficient reason to reject MCMC methods.	Conclusion
	For our models, the number of samples from the posterior that can be generated within a reasonable amount of time will typically be constrained by the available computer resources.	Conclusion
	However, as mentioned above, sampling the feature vectors for multiple users or movies in parallel provides an easy way to greatly speed up the process of generating samples using multiple cores.	Conclusion
							1	2	0	0	0	0	0	0	0	0	0	0	0	0	0	5	0	0	0	0	0	0	0	1	1	3	0	0	3	0	0	0	0	0	1	2	1	2	0	1	0	3	0
DISCUSSION OF NEGATIVE POTENTIAL
To what extent does the paper engage with negative potential? 0=Doesn't mention negative potential 1=Only mentions negative potential 2=Discusses negative potential 3=Deepens our understanding of negative potential				0
If >0, does the paper call for technical improvement or questioning?
[truncated: 42 more columns]

## Sheet: 4
PAPER TITLE	Efficient Projections onto the ℓ1-Ball for Learning in High Dimensions
PAPER URL	http://icml2008.cs.helsinki.fi/papers/361.pdf
CORPORATE AFFILIATION, IF ANY	Google, Toyota Technological Institute
FUNDING AGENCIES, IF ANY	not clearly disclosed
JUSTIFICATION							General																								Performance												Advances understanding in the field
Document the justificatory steps and the values in them.	Quotation	Section		Brief summary	Additional Notes	Starred example?	Novelty	Simplicity	Generalization	Flexibility/Extensibility	Robustness	Realistic output	Formal description/analysis	Theoretical guarantees	Approximation	Quantitative evidence (e.g. experiments)	Qualitative evidence (e.g. examples)	Scientific methodology	Controllability (of model owner)	Human-like mechanism	Low cost	Large scale	Promising	Generality	Principled	Certainty	Exactness	Preciseness	Concreteness	Automatic	Performance	Accuracy	Avoiding train/test discrepancy	State-of-the-art	Efficiency	Reduced training time	Memory efficiency	Data efficiency	Label efficiency (reduced need for labeled data)	Energy efficiency	Effectiveness	Successful	Building on classic work	Building on recent work	Unifying ideas or integrating components	Identifying limitations	Critique	Understanding (for researchers)	Improvement
Specific Instructions: State each explicit step in the chain. Also state each implict step, which are the assumptions you would be making to make a valid argument. Mark the explicit values in them. e = explicit evidence of value; i = implicit evidence of value; d = definition of value given	This setting is especially useful for online learning in sparse feature spaces such as text categorization applications.	Abstract			paper assumes reader recognizes the usefulness / justification of projection
Is the societal need/justification for this paper well-defended? 0=Doesn't rigorously justify how it achieves internal goal 1=Justifies how it achieves internal goal but no mention of any societal need 2=States but does not justify how it connect to a societal need 3=States and somewhat justifies how it connects to a societal need 4=States and rigorously justifies how it connects to a a societal …				1
At a high level, what task does this paper say it is engaged in? (Classification, Prediction, Generation, Understanding, Defenses, Transparency, Something else?)				Understanding / Optimization / Theory
Do they mention a need of ML researchers? (e=explicit, i=implicit)				no
Do they mention a need of tech companies? (e=explicit, i=implicit)				no
Do they mention a need of data sources? (e=explicit, i=implicit)				no
Do they mention a need of users? (e=explicit, i=implicit)				no
Do they mention a need of someone else?				no
UPLIFTED VALUES
							General																								Performance												Advances understanding in the field
Document all uplifted values	Quotation	Section			Additional Notes	Starred example?	Novelty	Simplicity	Generalization	Flexibility/Extensibility	Robustness	Realistic output	Formal description/analysis	Theoretical guarantees	Approximation	Quantitative evidence (e.g. experiments)	Qualitative evidence (e.g. examples)	Scientific methodology	Controllability (of model owner)	Human-like mechanism	Low cost	Large scale	Promising	Generality	Principled	Certainty	Exactness	Preciseness	Concreteness	Automatic	Performance	Accuracy	Avoiding train/test discrepancy	State-of-the-art	Efficiency	Reduced training time	Memory efficiency	Data efficiency	Label efficiency (reduced need for labeled data)	Energy efficiency	Effectiveness	Successful	Building on classic work	Building on recent work	Unifying ideas or integrating components	Identifying limitations	Critique	Understanding (for researchers)	Improvement
Specific Instructions: In the abstract, intro, discussion, and conclusion, go sentence by sentence. If a sentence contains any explicit or implicit values, mark them. e = explicit evidence of value; i = implicit evidence of value; d = definition of value given	We describe efﬁcient algorithms for projecting a vector onto the ℓ1-ball.	Abstract																																	e
	We present two methods for projection.	Abstract
	The ﬁrst performs exact projec- tion in O(n) expected time, where n is the di- mension of the space.	Abstract												i
	The second works on vec- tors k of whose elements are perturbed outside the ℓ1-ball, projecting in O(k log(n)) time.	Abstract												i
	This setting is especially useful for online learning in sparse feature spaces such as text categorization applications.	Abstract
	We demonstrate the merits and ef- fectiveness of our algorithms in numerous batch and online learning tasks.	Abstract																																							e
	We show that vari- ants of stochastic gradient projection methods augmented with our efﬁcient projection proce- dures outperform interior point methods, which are considered state-of-the-art optimization tech- niques.	Abstract																													i			e	e										i
	We also show that in online settings gra- dient updates with ℓ1 projections outperform the exponentiated gradient algorithm while obtain- ing models with high degrees of sparsity.	Abstract																													i
	A prevalent machine learning approach for decision and prediction problems is to cast the learning task as penal- ized convex optimization.	Introduction
	In penalized convex optimiza- tion we seek a set of parameters, gathered together in a vector w, which minimizes a convex objective function in w with an additional penalty term that assesses the com- plexity of w.	Introduction
	Two commonly used penalties are the 1- norm and the square of the 2-norm of w.	Introduction
	An alternative but mathematically equivalent approach is to cast the prob- lem as a constrained optimization problem.	Introduction													i
	In this setting we seek a minimizer of the objective function while con- straining the solution to have a bounded norm.	Introduction
	Many re- cent advances in statistical machine learning and related ﬁelds can be explained as convex optimization subject to a 1-norm constraint on the vector of parameters w.	Introduction																																										i
	Im- posing an ℓ1 constraint leads to notable beneﬁts.	Introduction
	First, it encourages sparse solutions, i.e a solution for which many components of w are zero.	Introduction
	When the original dimension of w is very high, a sparse solution enables easier inter- pretation of the problem in a lower dimension space.	Introduction
	For the usage of ℓ1-based approach in statistical machine learn- ing see for example (Tibshirani, 1996) and the references therein.	Introduction																																										i
	Donoho (2006b) provided sufﬁcient conditions for obtaining an optimal ℓ1-norm solution which is sparse.	Introduction																																										i
	Re- cent work on compressed sensing (Candes, 2006; Donoho, 2006a) further explores how ℓ1 constraints can be used for recovering a sparse signal sampled below the Nyquist rate.	Introduction																																										i
	The second motivation for using ℓ1 constraints in machine learning problems is that in some cases it leads to improved generalization bounds.	Introduction							e
	For example, Ng (2004) examined the task of PAC learning a sparse predictor and analyzed cases in which an ℓ1 constraint results in better solutions than an ℓ2 constraint.	Introduction																																										i
	In this paper we re-examine the task of minimizing a con- vex function subject to an ℓ1 constraint on the norm of the solution.	Introduction
	We are particularly interested in cases where the convex function is the average loss over a training set of m examples where each example is represented as a vector of high dimension.	Introduction
	Thus, the solution itself is a high-dimensional vector as well.	Introduction
	Recent work on ℓ2 constrained optimization for machine learning indicates that gradient-related projection algorithms are more efﬁ- cient in approaching a solution of good generalization than second-order algorithms when the number of examples and the dimension are large.	Introduction							e																										e
	For instance, Shalev-Shwartz et al. (2007) give recent state-of-the-art methods for solv- ing large scale support vector machines.	Introduction																				e												e
	Adapting these recent results to projection methods onto the ℓ1 ball poses algorithmic challenges.	Introduction																																										i
	While projections onto ℓ2 balls are straightforward to implement in linear time with the ap- propriate data structures, projection onto an ℓ1 ball is a more involved task.	Introduction
	The main contribution of this paper is the derivation of gradient projections with ℓ1 domain con- straints that can be performed almost as fast as gradient projection with ℓ2 constraints.	Introduction
	Our starting point is an efﬁcient method for projection onto the probabilistic simplex.	Introduction																																	e
	The basic idea is to show that, after sorting the vector we need to project, it is possible to calculate the projection exactly in linear time.	Introduction												i
	This idea was rediscovered multiple times.	Introduction
	It was ﬁrst described in an abstract and somewhat opaque form in the work of Gafni and Bertsekas (1984) and Bertsekas (1999).	Introduction																																									i
	Crammer and Singer (2002) rediscovered a similar projection algorithm as a tool for solving the dual of multiclass SVM.	Introduction																																									i
	Hazan (2006) essentially reuses the same algorithm in the con- text of online convex programming.	Introduction																																										i
	Our starting point is another derivation of Euclidean projection onto the sim- plex that paves the way to a few generalizations.	Introduction
	First we show that the same technique can also be used for project- ing onto the ℓ1-ball.	Introduction
	This algorithm is based on sorting the components of the vector to be projected and thus requires O(n log(n)) time.	Introduction												i
	We next present an improvement of the algorithm that replaces sorting with a procedure resembling median-search whose expected time complexity is O(n).	Introduction												i
	In many applications, however, the dimension of the feature space is very high yet the number of features which attain non-zero values for an example may be very small.	Introduction																																			i	i
	For in- stance, in our experiments with text classiﬁcation in Sec.	Introduction
	7, the dimension is two million (the bigram dictionary size) while each example has on average one-thousand non-zero features (the number of unique tokens in a document).	Introduction
	Ap- plications where the dimensionality is high yet the number of “on” features in each example is small render our second algorithm useless in some cases.	Introduction
	We therefore shift gears and describe a more complex algorithm that employs red- black trees to obtain a linear dependence on the number of non-zero features in an example and only logarithmic dependence on the full dimension.	Introduction												e
	The key to our con- struction lies in the fact that we project vectors that are the sum of a vector in the ℓ1-ball and a sparse vector—they are “almost” in the ℓ1-ball.	Introduction
	In conclusion to the paper we present experimental results that demonstrate the merits of our algorithms.	Introduction														i
	We compare our algorithms with several specialized interior point (IP) methods as well as general methods from the literature for solving ℓ1-penalized problems on both synthetic and real data (the MNIST handwritten digit dataset and the Reuters RCV1 corpus) for batch and online learning.	Introduction
	Our projec- tion based methods outperform competing algorithms in terms of sparsity, and they exhibit faster convergence and lower regret than previous methods.	Introduction																																		i	i	i
							0	0	2	0	0	0	0	6	1	1	0	0	0	0	0	1	0	0	0	0	0	0	0	0	2	0	0	2	4	1	2	2	0	0	1	0	2	7	1	0	0	0	0
DISCUSSION OF NEGATIVE POTENTIAL
To what extent does the paper engage with negative potential? 0=Doesn't mention negative potential 1=Only mentions negative potential 2=Discusses negative potential 3=Deepens our understanding of negative potential				0
If >0, does the paper call for technical improvement or questioning?
[truncated: 42 more columns]

## Sheet: 5
PAPER TITLE	Adversarial Examples are not Bugs, they are Features
PAPER URL	http://papers.nips.cc/paper/8307-adversarial-examples-are-not-bugs-they-are-features.pdf
CORPORATE AFFILIATION, IF ANY
FUNDING AGENCIES, IF ANY	NSF grants CCF-1553428, CCF-1563880, CNS-1413920, CNS1815221, IIS-1447786, IIS-1607189, the Microsoft Corporation, the Intel Corporation, the MITIBM Watson AI Lab research grant, and an Analog Devices Fellowship
JUSTIFICATION							General																								Performance												Advances understanding in the field
Document the justificatory steps and the values in them.	Quotation	Section		Brief summary	Additional Notes	Starred example?	Novelty	Simplicity	Generalization	Flexibility/Extensibility	Robustness	Realistic output	Formal description/analysis	Theoretical guarantees	Approximation	Quantitative evidence (e.g. experiments)	Qualitative evidence (e.g. examples)	Scientific methodology	Controllability (of model owner)	Human-like mechanism	Low cost	Large scale	Promising	Generality	Principled	Certainty	Exactness	Preciseness	Concreteness	Automatic	Performance	Accuracy	Avoiding train/test discrepancy	State-of-the-art	Efficiency	Reduced training time	Memory efficiency	Data efficiency	Label efficiency (reduced need for labeled data)	Energy efficiency	Effectiveness	Successful	Building on classic work	Building on recent work	Unifying ideas or integrating components	Identifying limitations	Critique	Understanding (for researchers)	Improvement
Specific Instructions: State each explicit step in the chain. Also state each implict step, which are the assumptions you would be making to make a valid argument. Mark the explicit values in them. e = explicit evidence of value; i = implicit evidence of value; d = definition of value given	Adversarial examples have attracted significant attention in machine learning, but the reasons for their existence and pervasiveness remain unclear.	Abstract																																														i
	The pervasive brittleness of deep neural networks [Sze+14; Eng+19b; HD19; Ath+18] has attracted significant attention in recent years	Introduction									i																																	i
Is the societal need/justification for this paper well-defended? 0=Doesn't rigorously justify how it achieves internal goal 1=Justifies how it achieves internal goal but no mention of any societal need 2=States but does not justify how it connect to a societal need 3=States and somewhat justifies how it connects to a societal need 4=States and rigorously justifies how it connects to a a societal …				1
At a high level, what task does this paper say it is engaged in? (Classification, Prediction, Generation, Understanding, Defenses, Transparency, Something else?)				understanding
Do they mention a need of ML researchers? (e=explicit, i=implicit)				i
Do they mention a need of tech companies? (e=explicit, i=implicit)
Do they mention a need of data sources? (e=explicit, i=implicit)
Do they mention a need of users? (e=explicit, i=implicit)
Do they mention a need of someone else?
UPLIFTED VALUES
							General																								Performance												Advances understanding in the field
Document all uplifted values	Quotation	Section			Additional Notes	Starred example?	Novelty	Simplicity	Generalization	Flexibility/Extensibility	Robustness	Realistic output	Formal description/analysis	Theoretical guarantees	Approximation	Quantitative evidence (e.g. experiments)	Qualitative evidence (e.g. examples)	Scientific methodology	Controllability (of model owner)	Human-like mechanism	Low cost	Large scale	Promising	Generality	Principled	Certainty	Exactness	Preciseness	Concreteness	Automatic	Performance	Accuracy	Avoiding train/test discrepancy	State-of-the-art	Efficiency	Reduced training time	Memory efficiency	Data efficiency	Label efficiency (reduced need for labeled data)	Energy efficiency	Effectiveness	Successful	Building on classic work	Building on recent work	Unifying ideas or integrating components	Identifying limitations	Critique	Understanding (for researchers)	Improvement
	Adversarial examples have attracted significant attention in machine learning, but the reasons for their existence and pervasiveness remain unclear.	Abstract																																														i
	We demonstrate that adversarial examples can be directly attributed to the presence of non-robust features: features (derived from patterns in the data distribution) that are highly predictive, yet brittle and (thus) incomprehensible to humans.	Abstract
	After capturing these features within a theoretical framework, we establish their widespread existence in standard datasets.	Abstract
	Finally, we present a simple setting where we can rigorously tie the phenomena we observe in practice to a misalignment between the (human-specified) notion of robustness and the inherent geometry of the data.	Abstract
	The pervasive brittleness of deep neural networks [Sze+14; Eng+19b; HD19; Ath+18] has attracted significant attention in recent years	Introduction									i																																	i
Specific Instructions: In the abstract, intro, discussion, and conclusion, go sentence by sentence. If a sentence contains any explicit or implicit values, mark them. e = explicit evidence of value; i = implicit evidence of value; d = definition of value given	Particularly worrisome is the phenomenon of adversarial examples [Big+13; Sze+14], imperceptibly perturbed natural inputs that induce erroneous predictions in state-of-the-art classifiers.	Introduction									i																							e
	Previous work has proposed a variety of explanations for this phenomenon, ranging from theoretical models [Sch+18; BPR18] to arguments based on concentration of measure in high-dimensions [Gil+18; MDM18; Sha+19a].	Introduction
	These theories, however, are often unable to fully capture behaviors we observe in practice (we discuss this further in Section 5).	Introduction
	More broadly, previous work in the field tends to view adversarial examples as aberrations arising either from the high dimensional nature of the input space or statistical fluctuations in the training data [GSS15; Gil+18]. F	Introduction
	From this point of view, it is natural to treat adversarial robustness as a goal that can be disentangled and pursued independently from maximizing accuracy [Mad+18; SHS19; Sug+19], either through improved standard regularization methods [TG16] or pre/post-processing of network inputs/outputs [Ues+18; CW17a; He+17].	Introduction									e																					e
	In this work, we propose a new perspective on the phenomenon of adversarial examples.	Introduction
	In contrast to the previous models, we cast adversarial vulnerability as a fundamental consequence of the dominant supervised learning paradigm	Introduction
	Specifically, we claim that: Adversarial vulnerability is a direct result of sensitivity to well-generalizing features in the data	Introduction
	Recall that we usually train classifiers to solely maximize (distributional) accuracy.	Introduction
	Consequently, classifiers tend to use any available signal to do so, even those that look incomprehensible to humans	Introduction
	After all, the presence of “a tail” or “ears” is no more natural to a classifier than any other equally predictive feature.	Introduction
	In fact, we find that standard ML datasets do admit highly predictive yet imperceptible features.	Introduction																																												i		i
	We posit that our models learn to rely on these “non-robust” features, leading to adversarial perturbations that exploit this dependence	Introduction
	Our hypothesis also suggests an explanation for adversarial transferability: the phenomenon that perturbations computed for one model often transfer to other, independently trained models.	Introduction																																														i
	Since any two models are likely to learn similar non-robust features, perturbations that manipulate such features will apply to both.	Introduction									e
	Finally, this perspective establishes adversarial vulnerability as a humancentric phenomenon, since, from the standard supervised learning point of view, non-robust features can be as important as robust ones.	Introduction
	It also suggests that approaches aiming to enhance the interpretability of a given model by enforcing “priors” for its explanation [MV15; OMS17; Smi+17] actually hide features that are “meaningful” and predictive to standard models.	Introduction																																													i	i
	As such, producing human-meaningful explanations that remain faithful to underlying models cannot be pursued independently from the training of the models themselves	Introduction																																														i
	To corroborate our theory, we show that it is possible to disentangle robust from non-robust features in standard image classification datasets.	Introduction									e
	We are able to effectively remove non-robust features from a dataset.	Introduction									e
	Concretely, we create a training set (semantically similar to the original) on which standard training yields good robust accuracy on the original, unmodified test set. T	Introduction									e																		e			e	e
	This finding establishes that adversarial vulnerability is not necessarily tied to the standard training framework, but is also a property of the dataset.	Introduction
	We are also able to construct a training dataset for which the inputs are nearly identical to the originals, but all appear incorrectly labeled. I
	In fact, the inputs in the new training set are associated to their labels only through small adversarial perturbations (and hence utilize only nonrobust features).	Introduction									e
	Despite the lack of any predictive human-visible information, training on this dataset yields good accuracy on the original, unmodified test set.	Introduction																														e
	This demonstrates that adversarial perturbations can arise from flipping features in the data that are useful for classification of correct inputs (hence not being purely aberrations).	Introduction
	Finally, we present a concrete classification task where the connection between adversarial examples and non-robust features can be studied rigorously.	Introduction									e																		e
	This task consists of separating Gaussian distributions, and is loosely based on the model presented in Tsipras et al. [Tsi+19], while expanding upon it in a few ways.	Introduction																																										i
	First, adversarial vulnerability in our setting can be precisely quantified as a difference between the intrinsic data geometry and that of the adversary’s perturbation set	Introduction														e												e
	Second, robust training yields a classifier which utilizes a geometry corresponding to a combination of these two.	Introduction									e
	Lastly, the gradients of standard models can be significantly misaligned with the inter-class direction, capturing a phenomenon that has been observed in practice [Tsi+19].	Introduction
	Our analysis suggests that rather than offering quantitative classification benefits, a natural way to view the role of robust optimization is as enforcing a prior over the features learned by the classifier.	Discussion									e																																					i
	The strength of the adversary then allows for a trade-off between the enforced prior, and the data-dependent features.	Discussion																																														i
	In this work, we cast the phenomenon of adversarial examples as a natural consequence of the presence of highly predictive but non-robust features in standard ML datasets.	Conclusion									e																																					i
	We provide support for this hypothesis by explicitly disentangling robust and non-robust features in standard datasets, as well as showing that non-robust features alone are sufficient for good generalization.	Conclusion									e					i
	Finally, we study these phenomena in more detail in a theoretical setting where we can rigorously study adversarial vulnerability, robust training, and gradient alignment.	Conclusion									e		i
	Our findings prompt us to view adversarial examples as a fundamentally human phenomenon.	Conclusion																																														i
	In particular, we should not be surprised that classifiers exploit highly predictive features that happen to be non-robust under a human-selected notion of similarity, given such features exist in real-world datasets.	Conclusion									e																																					i
	In the same manner, from the perspective of interpretability, as long as models rely on these non-robust features, we cannot expect to have model explanations that are both human-meaningful and faithful to the models themselves.	Conclusion									e																																					e
	Overall, attaining models that are robust and interpretable will require explicitly encoding human priors into the training process.	Conclusion									e																																					e
							0	0	0	0	17	0	1	0	0	2	0	0	0	0	0	0	0	0	0	0	0	1	2	0	0	3	1	1	0	0	0	0	0	0	0	0	0	2	0	1	1	12	0
DISCUSSION OF NEGATIVE POTENTIAL
To what extent does the paper engage with negative potential? 0=Doesn't mention negative potential 1=Only mentions negative potential 2=Discusses negative potential 3=Deepens our understanding of negative potential				0
If >0, does the paper call for technical improvement or questioning?
[truncated: 42 more columns]

## Sheet: 6
PAPER TITLE	MixMatch: A Holistic Approach to Semi-Supervised Learning
PAPER URL	http://papers.nips.cc/paper/8749-mixmatch-a-holistic-approach-to-semi-supervised-learning.pdf
CORPORATE AFFILIATION, IF ANY	Google Research
FUNDING AGENCIES, IF ANY
JUSTIFICATION							General																								Performance												Advances understanding in the field
Document the justificatory steps and the values in them.	Quotation	Section		Brief summary	Additional Notes	Starred example?	Novelty	Simplicity	Generalization	Flexibility/Extensibility	Robustness	Realistic output	Formal description/analysis	Theoretical guarantees	Approximation	Quantitative evidence (e.g. experiments)	Qualitative evidence (e.g. examples)	Scientific methodology	Controllability (of model owner)	Human-like mechanism	Low cost	Large scale	Promising	Generality	Principled	Certainty	Exactness	Preciseness	Concreteness	Automatic	Performance	Accuracy	Avoiding train/test discrepancy	State-of-the-art	Efficiency	Reduced training time	Memory efficiency	Data efficiency	Label efficiency (reduced need for labeled data)	Energy efficiency	Effectiveness	Successful	Building on classic work	Building on recent work	Unifying ideas or integrating components	Identifying limitations	Critique	Understanding (for researchers)	Improvement
Specific Instructions: State each explicit step in the chain. Also state each implict step, which are the assumptions you would be making to make a valid argument. Mark the explicit values in them. e = explicit evidence of value; i = implicit evidence of value; d = definition of value given	Semi-supervised learning has proven to be a powerful paradigm for leveraging unlabeled data to mitigate the reliance on large labeled datasets.	Abstract																																					e
	Yet, collecting labeled data is expensive for many learning tasks because it necessarily involves expert knowledge.	Introduction																																					i
	This is perhaps best illustrated by medical tasks where measurements call for expensive machinery and labels are the fruit of a time-consuming analysis that draws from multiple human experts.	Introduction																			i																		e
	Furthermore, data labels may contain private information.	Introduction
	In comparison, in many tasks it is much easier or cheaper to obtain unlabeled data.	Introduction																			i																		e
	Semi-supervised learning [6] (SSL) seeks to largely alleviate the need for labeled data by allowing a model to leverage unlabeled data.	Introduction
	Many recent approaches for semi-supervised learning add a loss term which is computed on unlabeled data and encourages the model to generalize better to unseen data.	Introduction																														i												i
	In much recent work, this loss term falls into one of three classes (discussed further in Section 2): entropy minimization [18, 28]—which encourages the model to output confident predictions on unlabeled data; consistency regularization—which encourages the model to produce the same output distribution when its inputs are perturbed; and generic regularization—which encourages the model to general…	Introduction																													e		e
Is the societal need/justification for this paper well-defended? 0=Doesn't rigorously justify how it achieves internal goal 1=Justifies how it achieves internal goal but no mention of any societal need 2=States but does not justify how it connect to a societal need 3=States and somewhat justifies how it connects to a societal need 4=States and rigorously justifies how it connects to a a societal …				2
At a high level, what task does this paper say it is engaged in? (Classification, Prediction, Generation, Understanding, Defenses, Transparency, Something else?)				describing (a new algorithm), prediction
Do they mention a need of ML researchers? (e=explicit, i=implicit)
Do they mention a need of tech companies? (e=explicit, i=implicit)
Do they mention a need of data sources? (e=explicit, i=implicit)
Do they mention a need of users? (e=explicit, i=implicit)
Do they mention a need of someone else?
UPLIFTED VALUES
							General																								Performance												Advances understanding in the field
Document all uplifted values	Quotation	Section			Additional Notes	Starred example?	Novelty	Simplicity	Generalization	Flexibility/Extensibility	Robustness	Realistic output	Formal description/analysis	Theoretical guarantees	Approximation	Quantitative evidence (e.g. experiments)	Qualitative evidence (e.g. examples)	Scientific methodology	Controllability (of model owner)	Human-like mechanism	Low cost	Large scale	Promising	Generality	Principled	Certainty	Exactness	Preciseness	Concreteness	Automatic	Performance	Accuracy	Avoiding train/test discrepancy	State-of-the-art	Efficiency	Reduced training time	Memory efficiency	Data efficiency	Label efficiency (reduced need for labeled data)	Energy efficiency	Effectiveness	Successful	Building on classic work	Building on recent work	Unifying ideas or integrating components	Identifying limitations	Critique	Understanding (for researchers)	Improvement
Specific Instructions: In the abstract, intro, discussion, and conclusion, go sentence by sentence. If a sentence contains any explicit or implicit values, mark them. e = explicit evidence of value; i = implicit evidence of value; d = definition of value given	Semi-supervised learning has proven to be a powerful paradigm for leveraging unlabeled data to mitigate the reliance on large labeled datasets.	Abstract																				i																	e
	In this work, we unify the current dominant approaches for semi-supervised learning to produce a new algorithm, MixMatch, that guesses low-entropy labels for data-augmented unlabeled examples and mixes labeled and unlabeled data using MixUp.	Abstract					e																																i					i	i
	MixMatch obtains state-of-the-art results by a large margin across many datasets and labeled data amounts.	Abstract																																e				i	i
	For example, on CIFAR-10 with 250 labels, we reduce error rate by a factor of 4 (from 38% to 11%) and by a factor of 2 on STL-10.	Abstract														i															i
	We also demonstrate how MixMatch can help achieve a dramatically better accuracy-privacy trade-off for differential privacy.	Abstract																														e
	Finally, we perform an ablation study to tease apart which components of MixMatch are most important for its success.	Abstract																																								e						i
	We release all code used in our experiments	Abstract
	Much of the recent success in training large, deep neural networks is thanks in part to the existence of large labeled datasets.	Introduction																				e																				e		i
	Yet, collecting labeled data is expensive for many learning tasks because it necessarily involves expert knowledge.	Introduction																																					i
	This is perhaps best illustrated by medical tasks where measurements call for expensive machinery and labels are the fruit of a time-consuming analysis that draws from multiple human experts.	Introduction																			i																		e
	Furthermore, data labels may contain private information.	Introduction
	In comparison, in many tasks it is much easier or cheaper to obtain unlabeled data.	Introduction																			i																		e
	Semi-supervised learning [6] (SSL) seeks to largely alleviate the need for labeled data by allowing a model to leverage unlabeled data.	Introduction																																					e
	Many recent approaches for semi-supervised learning add a loss term which is computed on unlabeled data and encourages the model to generalize better to unseen data.	Introduction																														i												i
	In much recent work, this loss term falls into one of three classes (discussed further in Section 2): entropy minimization [18, 28]—which encourages the model to output confident predictions on unlabeled data; consistency regularization—which encourages the model to produce the same output distribution when its inputs are perturbed; and generic regularization—which encourages the model to general…	Introduction																													e		e
	In this paper, we introduce MixMatch, an SSL algorithm which introduces a single loss that gracefully unifies these dominant approaches to semi-supervised learning.	Introduction																																										i	e
	g. Unlike previous methods, MixMatch targets all the properties at once which we find leads to the following benefits:	Introduction					e
	Experimentally, we show that MixMatch obtains state-of-the-art results on all standard image benchmarks (section 4.2), and reducing the error rate on CIFAR-10 by a factor of 4;	Introduction														e																i		e
	• We further show in an ablation study that MixMatch is greater than the sum of its parts;	Introduction
	We demonstrate in section 4.3 that MixMatch is useful for differentially private learning, enabling students in the PATE framework [36] to obtain new state-of-the-art results that simultaneously strengthen both privacy guarantees and accuracy.	Introduction																														e		e
	In short, MixMatch introduces a unified loss term for unlabeled data that seamlessly reduces entropy while maintaining consistency and remaining compatible with traditional regularization techniques.	Introduction
	We introduced MixMatch, a semi-supervised learning method which combines ideas and components from the current dominant paradigms for SSL.	Conclusion																																										i	e
	Through extensive experiments on semi-supervised and privacy-preserving learning, we found that MixMatch exhibited significantly improved performance compared to other methods in all settings we studied, often by a factor of two or more reduction in error rate.	Conclusion														e															e
	In future work, we are interested in incorporating additional ideas from the semi-supervised learning literature into hybrid methods and continuing to explore which components result in effective algorithms.	Conclusion																																							e				e
	Separately, most modern work on semi-supervised learning algorithms is evaluated on image benchmarks; we are interested in exploring the effectiveness of MixMatch in other domains.	Conclusion							i																																e
							2	0	1	0	0	0	0	0	0	3	0	0	0	0	2	2	0	0	0	0	0	0	0	0	3	4	1	3	0	0	0	1	7	0	2	2	0	5	4	0	0	1	0
DISCUSSION OF NEGATIVE POTENTIAL
To what extent does the paper engage with negative potential? 0=Doesn't mention negative potential 1=Only mentions negative potential 2=Discusses negative potential 3=Deepens our understanding of negative potential				0
If >0, does the paper call for technical improvement or questioning?
[truncated: 42 more columns]

## Sheet: 7
PAPER TITLE	SuperGLUE: A Stickier Benchmark for General-Purpose Language Understanding Systems
PAPER URL	http://papers.nips.cc/paper/8589-superglue-a-stickier-benchmark-for-general-purpose-language-understanding-systems.pdf
CORPORATE AFFILIATION, IF ANY	Facebook AI Research, DeepMind
FUNDING AGENCIES, IF ANY	Schmidt Futures program, NVIDIA Corporation, DeepMind, National Science Foundation Graduate Research Fellowship Program under Grant No. DGE 1342536, Samsung Advanced Institute of Technology (Next Generation Deep Learning: from Pattern Recognition to AI) and Samsung Electronics (Improving Deep Learning using Latent Structure)
JUSTIFICATION							General																								Performance												Advances understanding in the field
Document the justificatory steps and the values in them.	Quotation	Section		Brief summary	Additional Notes	Starred example?	Novelty	Simplicity	Generalization	Flexibility/Extensibility	Robustness	Realistic output	Formal description/analysis	Theoretical guarantees	Approximation	Quantitative evidence (e.g. experiments)	Qualitative evidence (e.g. examples)	Scientific methodology	Controllability (of model owner)	Human-like mechanism	Low cost	Large scale	Promising	Generality	Principled	Certainty	Exactness	Preciseness	Concreteness	Automatic	Performance	Accuracy	Avoiding train/test discrepancy	State-of-the-art	Efficiency	Reduced training time	Memory efficiency	Data efficiency	Label efficiency (reduced need for labeled data)	Energy efficiency	Effectiveness	Successful	Building on classic work	Building on recent work	Unifying ideas or integrating components	Identifying limitations	Critique	Understanding (for researchers)	Improvement
Specific Instructions: State each explicit step in the chain. Also state each implict step, which are the assumptions you would be making to make a valid argument. Mark the explicit values in them. e = explicit evidence of value; i = implicit evidence of value; d = definition of value given	GLUE was designed to provide a general-purpose evaluation of language understanding that covers a range of training data volumes, task genres, and task formulations.	Introduction							i	i
	The progress of the last twelve months has eroded headroom on the GLUE benchmark dramatically.	Introduction
	While some tasks (Figure 1) and some linguistic phenomena (Figure 2 in Appendix B) measured in GLUE remain difficult, the current state of the art GLUE Score as of early July 2019 (88.4 from Yang et al., 2019) surpasses human performance (87.1 from Nangia and Bowman, 2019) by 1.3 points, and in fact exceeds this human performance estimate on four tasks.	Introduction														e															e			e
	Consequently, while there remains substantial scope for improvement towards GLUE’s high-level goals, the original version of the benchmark is no longer a suitable metric for quantifying such progress.	Introduction														i																														i			e
Is the societal need/justification for this paper well-defended? 0=Doesn't rigorously justify how it achieves internal goal 1=Justifies how it achieves internal goal but no mention of any societal need 2=States but does not justify how it connect to a societal need 3=States and somewhat justifies how it connects to a societal need 4=States and rigorously justifies how it connects to a a societal …				1
At a high level, what task does this paper say it is engaged in? (Classification, Prediction, Generation, Understanding, Defenses, Transparency, Something else?)
Do they mention a need of ML researchers? (e=explicit, i=implicit)
Do they mention a need of tech companies? (e=explicit, i=implicit)
Do they mention a need of data sources? (e=explicit, i=implicit)
Do they mention a need of users? (e=explicit, i=implicit)
Do they mention a need of someone else?
UPLIFTED VALUES
							General																								Performance												Advances understanding in the field
Document all uplifted values	Quotation	Section			Additional Notes	Starred example?	Novelty	Simplicity	Generalization	Flexibility/Extensibility	Robustness	Realistic output	Formal description/analysis	Theoretical guarantees	Approximation	Quantitative evidence (e.g. experiments)	Qualitative evidence (e.g. examples)	Scientific methodology	Controllability (of model owner)	Human-like mechanism	Low cost	Large scale	Promising	Generality	Principled	Certainty	Exactness	Preciseness	Concreteness	Automatic	Performance	Accuracy	Avoiding train/test discrepancy	State-of-the-art	Efficiency	Reduced training time	Memory efficiency	Data efficiency	Label efficiency (reduced need for labeled data)	Energy efficiency	Effectiveness	Successful	Building on classic work	Building on recent work	Unifying ideas or integrating components	Identifying limitations	Critique	Understanding (for researchers)	Improvement
Specific Instructions: In the abstract, intro, discussion, and conclusion, go sentence by sentence. If a sentence contains any explicit or implicit values, mark them. e = explicit evidence of value; i = implicit evidence of value; d = definition of value given	In the last year, new models and methods for pretraining and transfer learning have driven striking performance improvements across a range of language understanding tasks.	Abstract					e		i																						e
	The GLUE benchmark, introduced a little over one year ago, offers a single-number metric that summarizes progress on a diverse set of such tasks, but performance on the benchmark has recently surpassed the level of non-expert humans, suggesting limited headroom for further research.	Abstract																													e															i
	In this paper we present SuperGLUE, a new benchmark styled after GLUE with a new set of more difficult language understanding tasks, a software toolkit, and a public leaderboard.	Abstract					e																																					e
	SuperGLUE is available at super.gluebenchmark.com.	Abstract
	Recently there has been notable progress across many natural language processing (NLP) tasks, led by methods such as ELMo (Peters et al., 2018), OpenAI GPT (Radford et al., 2018), and BERT (Devlin et al., 2019).	Introduction
	The unifying theme of these methods is that they couple self-supervised learning from massive unlabelled text corpora with effective adapting of the resulting model to target tasks.	Introduction																																							e
	The tasks that have proven amenable to this general approach include question answering, textual entailment, and parsing, among many others (Devlin et al., 2019; Kitaev et al., 2019, i.a.).	Introduction
	In this context, the GLUE benchmark (Wang et al., 2019a) has become a prominent evaluation framework for research towards general-purpose language understanding technologies.	Introduction
	GLUE is a collection of nine language understanding tasks built on existing public datasets, together with private test data, an evaluation server, a single-number target metric, and an accompanying expertconstructed diagnostic set.	Introduction
	GLUE was designed to provide a general-purpose evaluation of language understanding that covers a range of training data volumes, task genres, and task formulations.	Introduction							i	i
	We believe it was these aspects that made GLUE particularly appropriate for exhibiting the transferlearning potential of approaches like OpenAI GPT and BERT.	Introduction
	The progress of the last twelve months has eroded headroom on the GLUE benchmark dramatically.	Introduction
	While some tasks (Figure 1) and some linguistic phenomena (Figure 2 in Appendix B) measured in GLUE remain difficult, the current state of the art GLUE Score as of early July 2019 (88.4 from Yang et al., 2019) surpasses human performance (87.1 from Nangia and Bowman, 2019) by 1.3 points, and in fact exceeds this human performance estimate on four tasks.	Introduction														e															e			e
	Consequently, while there remains substantial scope for improvement towards GLUE’s high-level goals, the original version of the benchmark is no longer a suitable metric for quantifying such progress.	Introduction														i																														i			e
	In response, we introduce SuperGLUE, a new benchmark designed to pose a more rigorous test of language understanding	Introduction			"rigorous" as a value?		e																																					i
	SuperGLUE has the same high-level motivation as GLUE: to provide a simple, hard-to-game measure of progress toward general-purpose language understanding technologies for English.	Introduction						e			i																																	e
	We anticipate that significant progress on SuperGLUE should require substantive innovations in a number of core areas of machine learning, including sample-efficient, transfer, multitask, and unsupervised or self-supervised learning.	Introduction																																					i
	SuperGLUE follows the basic design of GLUE: It consists of a public leaderboard built around eight language understanding tasks, drawing on existing data, accompanied by a single-number performance metric, and an analysis toolkit.
	SuperGLUE retains the two hardest tasks in GLUE. The remaining tasks were identified from those submitted to an open call for task proposals and were selected based on difficulty for current NLP approaches.
	The task formats in GLUE are limited to sentence- and sentence-pair classification.
	We expand the set of task formats in SuperGLUE to include coreference resolution and question answering (QA).
	We include human performance estimates for all benchmark tasks, which verify that substantial headroom exists between a strong BERT-based baseline and human performance.	Introduction																													e
	We present SuperGLUE, a new benchmark for evaluating general-purpose language understanding systems.	Conclusion					e
	SuperGLUE updates the GLUE benchmark by identifying a new set of challenging NLU tasks, as measured by the difference between human and machine baselines.	Conclusion
	The set of eight tasks in our benchmark emphasizes diverse task formats and low-data training data tasks, with nearly half the tasks having fewer than 1k examples and all but one of the tasks having fewer than 10k examples.	Conclusion							i																														i
	We evaluate BERT-based baselines and find that they still lag behind humans by nearly 20 points.	Conclusion																													i
	Given the difficulty of SuperGLUE for BERT, we expect that further progress in multi-task, transfer, and unsupervised/self-supervised learning techniques will be necessary to approach human-level performance on the benchmark.	Conclusion																													e
	Overall, we argue that SuperGLUE offers a rich and challenging testbed for work developing new general-purpose machine learning methods for language understanding.	Conclusion					e		i
							5	1	4	1	1	0	0	0	0	2	0	0	0	0	0	0	0	0	0	0	0	0	0	0	6	0	0	1	0	0	0	0	2	0	1	0	0	3	0	2	0	0	1
DISCUSSION OF NEGATIVE POTENTIAL
To what extent does the paper engage with negative potential? 0=Doesn't mention negative potential 1=Only mentions negative potential 2=Discusses negative potential 3=Deepens our understanding of negative potential				1	has section on "Analyzing Gender Bias in Models" and disucsses Winogender metric to measure gender bias, as well as its many limitations. however, really just mentions the negative potential while discussing the inclusion of the metric.
If >0, does the paper call for technical improvement or questioning?				no, though it does discuss the limitations of this metric
[truncated: 42 more columns]

## Sheet: 8
PAPER TITLE	Measuring Invariances in Deep Networks
PAPER URL	http://papers.nips.cc/paper/3790-measuring-invariances-in-deep-networks.pdf
CORPORATE AFFILIATION, IF ANY
FUNDING AGENCIES, IF ANY	National Science Foundation under grant EFRI-0835878, and in part by the Office of Naval Research under MURI N000140710747
JUSTIFICATION							General																								Performance												Advances understanding in the field
Document the justificatory steps and the values in them.	Quotation	Section		Brief summary	Additional Notes	Starred example?	Novelty	Simplicity	Generalization	Flexibility/Extensibility	Robustness	Realistic output	Formal description/analysis	Theoretical guarantees	Approximation	Quantitative evidence (e.g. experiments)	Qualitative evidence (e.g. examples)	Scientific methodology	Controllability (of model owner)	Human-like mechanism	Low cost	Large scale	Promising	Generality	Principled	Certainty	Exactness	Preciseness	Concreteness	Automatic	Performance	Accuracy	Avoiding train/test discrepancy	State-of-the-art	Efficiency	Reduced training time	Memory efficiency	Data efficiency	Label efficiency (reduced need for labeled data)	Energy efficiency	Effectiveness	Successful	Building on classic work	Building on recent work	Unifying ideas or integrating components	Identifying limitations	Critique	Understanding (for researchers)	Improvement
Specific Instructions: State each explicit step in the chain. Also state each implict step, which are the assumptions you would be making to make a valid argument. Mark the explicit values in them. e = explicit evidence of value; i = implicit evidence of value; d = definition of value given	For many pattern recognition tasks, the ideal input feature would be invariant to multiple confounding properties (such as illumination and viewing angle, in computer vision applications).	Abstract								i	i
	Recently, deep architectures trained in an unsupervised manner have been proposed as an automatic method for extracting useful features.	Abstract																												e
Is the societal need/justification for this paper well-defended? 0=Doesn't rigorously justify how it achieves internal goal 1=Justifies how it achieves internal goal but no mention of any societal need 2=States but does not justify how it connect to a societal need 3=States and somewhat justifies how it connects to a societal need 4=States and rigorously justifies how it connects to a a societal …				1
At a high level, what task does this paper say it is engaged in? (Classification, Prediction, Generation, Understanding, Defenses, Transparency, Something else?)				Evaluation, Understanding(?)
Do they mention a need of ML researchers? (e=explicit, i=implicit)				i	"in the future, a variety of mechanisms should be explored in order to learn better features"
Do they mention a need of tech companies? (e=explicit, i=implicit)
Do they mention a need of data sources? (e=explicit, i=implicit)
Do they mention a need of users? (e=explicit, i=implicit)
Do they mention a need of someone else?
UPLIFTED VALUES
							General																								Performance												Advances understanding in the field
Document all uplifted values	Quotation	Section			Additional Notes	Starred example?	Novelty	Simplicity	Generalization	Flexibility/Extensibility	Robustness	Realistic output	Formal description/analysis	Theoretical guarantees	Approximation	Quantitative evidence (e.g. experiments)	Qualitative evidence (e.g. examples)	Scientific methodology	Controllability (of model owner)	Human-like mechanism	Low cost	Large scale	Promising	Generality	Principled	Certainty	Exactness	Preciseness	Concreteness	Automatic	Performance	Accuracy	Avoiding train/test discrepancy	State-of-the-art	Efficiency	Reduced training time	Memory efficiency	Data efficiency	Label efficiency (reduced need for labeled data)	Energy efficiency	Effectiveness	Successful	Building on classic work	Building on recent work	Unifying ideas or integrating components	Identifying limitations	Critique	Understanding (for researchers)	Improvement
Specific Instructions: In the abstract, intro, discussion, and conclusion, go sentence by sentence. If a sentence contains any explicit or implicit values, mark them. e = explicit evidence of value; i = implicit evidence of value; d = definition of value given	For many pattern recognition tasks, the ideal input feature would be invariant to multiple confounding properties (such as illumination and viewing angle, in computer vision applications).	Abstract								i	i
	Recently, deep architectures trained in an unsupervised manner have been proposed as an automatic method for extracting useful features.	Abstract																												e
	In this paper, we propose a number of empirical tests that directly measure the degree to which these learned features are invariant to different input transformations.	Abstract									i					e
	Invariance to abstract input variables is a highly desirable property of features for many detection and classification tasks, such as object recognition.	Introduction			value for "selectivity"						i
	The concept of invariance implies a selectivity for complex, high level features of the input and yet a robustness to irrelevant input transformations.	Introduction									e
	This tension between selectivity and robustness makes learning invariant features nontrivial.	Introduction									e
	In this paper, we propose to use a suite of “invariance tests” that directly measure the invariance properties of features; this gives us a measure of the quality of features learned in an unsupervised manner by a deep learning algorithm.	Introduction									i					i
	Our work also seeks to address the question: why are deep learning algorithms useful?	Introduction
	? Bengio and LeCun gave a theoretical answer to this question, in which they showed that a deep architecture is necessary to represent many functions compactly	Introduction												i
	A second answer can also be found in such work as [2, 3, 4, 5], which shows that such architectures lead to useful representations for classification.	Introduction
	In this paper, we give another, empirical, answer to this question: namely, we show that with increasing depth, the representations learned can also enjoy an increased degree of invariance.	Introduction			when invariance is explicitly used, 'i' for robustness						i					i
	In computer vision, one can view object recognition performance as a measure of the invariance of the underlying features.	Introduction									i																				e
	While such an end-to-end system performance measure has many benefits, it can also be expensive to compute and does not give much insight into how to directly improve representations in each layer of deep architectures.	Introduction			"expensive to compute" does not specify low cost or computational efficiency																i										e																	i
	The test suite presented in this paper provides an alternative that can identify the robustness of deep architectures to specific types of variations.	Introduction									e
	We demonstrate that using videos gives similar results to the more traditional method of measuring responses to sinusoidal gratings; however, the natural video approach enables us to test invariance to a wide range of transformations while the grating test only allows changes in stimulus position, orientation, and frequency.	Introduction									i
	Our proposed invariance measure is broadly applicable to evaluating many deep learning algorithms for many tasks, but the present paper will focus on two different algorithms applied to computer vision.	Introduction								i	i
	These networks were shown by Larochelle et al. [3] to learn useful features for a range of vision tasks; this suggests that their learned features are significantly invariant to the transformations present in those tasks.	Introduction									i
	We find that when trained under these conditions, stacked autoencoders learn increasingly invariant features with depth, but the effect of depth is small compared to other factors such as regularization.	Introduction									i
	Next, we show that convolutional deep belief networks (CDBNs) [5], which are hand-designed to be invariant to certain local image translations, do enjoy dramatically increasing invariance with depth.	Introduction									i
	This suggests that there is a benefit to using deep architectures, but that mechanisms besides simple stacking of autoencoders are important for gaining increasing invariance.	Introduction									i
	We defined a general formula for a test metric, and demonstrated how to implement it using synthetic grating images as well as natural videos which reveal more types of invariances than just 2-D (in-plane) rotation, translation and frequency.	Dicussion and Conclusion									i
	At the level of a single hidden unit, our firing rate invariance measure requires learned features to balance high local firing rates with low global firing rates.	Dicussion and Conclusion									i
	As learning algorithms become more advanced, another appropriate measure of invariance may be a hidden unit’s invariance to object identity.	Dicussion and Conclusion									i
	We found that none of our networks gave good results.	Dicussion and Conclusion																																												i
	At the network level, our measure requires networks to have at least some subpopulation of hidden units that are invariant to each type of transformation.	Dicussion and Conclusion									i
	For example, one very useful way of representing a stimulus would be to use some subset of hidden units to represent its orientation, another subset to represent its position, and another subset to represent its identity.	Dicussion and Conclusion															i
	Even though this would be an extremely powerful feature representation, a value of p set too high would result in penalizing some of these subsets for not being invariant.	Dicussion and Conclusion									i
	We also illustrated extensive findings made by applying the invariance test on computer vision tasks	Dicussion and Conclusion
	However, the definition of our metric is sufficiently general that it could easily be used to test, for example, invariance of auditory features to rate of speech, or invariance of textual features to author identity.	Dicussion and Conclusion							e
	A surprising finding in our experiments with visual data is that stacked autoencoders yield only modest improvements in invariance as depth increases.	Dicussion and Conclusion														i
	This suggests that while depth is valuable, mere stacking of shallow architectures may not be sufficient to exploit the full potential of deep architectures to learn invariant features.	Dicussion and Conclusion
	For example, one promising approach that we are currently investigating is the idea of learning slow features [19] from temporal data.	Dicussion and Conclusion																					e
	We also document that explicit approaches to achieving invariance such as max-pooling and weightsharing in CDBNs are currently successful strategies for achieving invariance.	Dicussion and Conclusion									i
	This is not suprising given the fact that invariance is hard-wired into the network, but it validates the fact that our metric faithfully measures invariances.	Dicussion and Conclusion			"faithfully" feels like a value						i
	It is not obvious how to extend these explicit strategies to become invariant to more intricate transformations like large-angle out-of-plane rotations and complex illumination changes, and we expect that our metrics will be useful in guiding efforts to develop learning algorithms that automatically discover much more invariant features without relying on hard-wired strategies.	Dicussion and Conclusion								i	i																			e
							0	0	1	3	23	0	0	1	0	4	1	0	0	0	1	0	1	0	0	0	0	0	0	2	2	0	0	0	0	0	0	0	0	0	0	0	0	0	0	1	0	1	0
DISCUSSION OF NEGATIVE POTENTIAL
To what extent does the paper engage with negative potential? 0=Doesn't mention negative potential 1=Only mentions negative potential 2=Discusses negative potential 3=Deepens our understanding of negative potential				0
If >0, does the paper call for technical improvement or questioning?
[truncated: 42 more columns]

## Sheet: 9
PAPER TITLE	NAS-Bench-101: Towards Reproducible Neural Architecture Search
PAPER URL	https://arxiv.org/pdf/1902.09635.pdf
CORPORATE AFFILIATION, IF ANY	Google Brain, Google
FUNDING AGENCIES, IF ANY	European Research Council (ERC) under the European Union’s Horizon 2020 research and innovation programme under grant no. 716721, by BMBF grant DeToL, by the state of Baden-Wurttemberg through bwHPC and the Ger- ¨ man Research Foundation (DFG) through grant no INST 39/963-1 FUGG, and by a Google Faculty Research Award.
JUSTIFICATION							General																								Performance												Advances understanding in the field
Document the justificatory steps and the values in them.	Quotation	Section		Brief summary	Additional Notes	Starred example?	Novelty	Simplicity	Generalization	Flexibility/Extensibility	Robustness	Realistic output	Formal description/analysis	Theoretical guarantees	Approximation	Quantitative evidence (e.g. experiments)	Qualitative evidence (e.g. examples)	Scientific methodology	Controllability (of model owner)	Human-like mechanism	Low cost	Large scale	Promising	Generality	Principled	Certainty	Exactness	Preciseness	Concreteness	Automatic	Performance	Accuracy	Avoiding train/test discrepancy	State-of-the-art	Efficiency	Reduced training time	Memory efficiency	Data efficiency	Label efficiency (reduced need for labeled data)	Energy efficiency	Effectiveness	Successful	Building on classic work	Building on recent work	Unifying ideas or integrating components	Identifying limitations	Critique	Understanding (for researchers)	Improvement
Specific Instructions: State each explicit step in the chain. Also state each implict step, which are the assumptions you would be making to make a valid argument. Mark the explicit values in them. e = explicit evidence of value; i = implicit evidence of value; d = definition of value given	Many successes in deep learning (Krizhevsky et al., 2012; Goodfellow et al., 2014; Sutskever et al., 2014) have resulted from novel neural network architecture designs.	Introduction					e
	This proliferation of choices has fueled research into neural architecture search (NAS), which casts the discovery of new architectures as an optimization problem	Introduction					e
	This has resulted in state of the art performance in the domain of image classification (Zoph et al., 2018; Real et al., 2018; Huang et al., 2018), and has shown promising results in other domains, such as sequence modeling (Zoph & Le, 2016; So et al., 2019).	Introduction							i														e											e
	Unfortunately, NAS research is notoriously hard to reproduce (Li & Talwalkar, 2019; Sciuto et al., 2019).	Introduction
	First, some methods require months of compute time (e.g., Zoph et al., 2018), making these methods inaccessible to most researchers	Introduction																																	i
	Second, while recent improvements (Liu et al., 2018a; Pham et al., 2018; Liu et al., 2018b) have yielded more efficient methods, different methods are not comparable to each other due to different training procedures and different search spaces, which make it difficult to attribute the success of each method to the search algorithm itself.	Introduction																																	e													i
Is the societal need/justification for this paper well-defended? 0=Doesn't rigorously justify how it achieves internal goal 1=Justifies how it achieves internal goal but no mention of any societal need 2=States but does not justify how it connect to a societal need 3=States and somewhat justifies how it connects to a societal need 4=States and rigorously justifies how it connects to a a societal …				2
At a high level, what task does this paper say it is engaged in? (Classification, Prediction, Generation, Understanding, Defenses, Transparency, Something else?)				evaluation / dataset creation
Do they mention a need of ML researchers? (e=explicit, i=implicit)				i	Mentions hope that this paper is the first of many to continue NAS research
Do they mention a need of tech companies? (e=explicit, i=implicit)
Do they mention a need of data sources? (e=explicit, i=implicit)
Do they mention a need of users? (e=explicit, i=implicit)
Do they mention a need of someone else?
UPLIFTED VALUES
							General																								Performance												Advances understanding in the field
Document all uplifted values	Quotation	Section			Additional Notes	Starred example?	Novelty	Simplicity	Generalization	Flexibility/Extensibility	Robustness	Realistic output	Formal description/analysis	Theoretical guarantees	Approximation	Quantitative evidence (e.g. experiments)	Qualitative evidence (e.g. examples)	Scientific methodology	Controllability (of model owner)	Human-like mechanism	Low cost	Large scale	Promising	Generality	Principled	Certainty	Exactness	Preciseness	Concreteness	Automatic	Performance	Accuracy	Avoiding train/test discrepancy	State-of-the-art	Efficiency	Reduced training time	Memory efficiency	Data efficiency	Label efficiency (reduced need for labeled data)	Energy efficiency	Effectiveness	Successful	Building on classic work	Building on recent work	Unifying ideas or integrating components	Identifying limitations	Critique	Understanding (for researchers)	Improvement
Specific Instructions: In the abstract, intro, discussion, and conclusion, go sentence by sentence. If a sentence contains any explicit or implicit values, mark them. e = explicit evidence of value; i = implicit evidence of value; d = definition of value given	Many successes in deep learning (Krizhevsky et al., 2012; Goodfellow et al., 2014; Sutskever et al., 2014) have resulted from novel neural network architecture designs.	Introduction					e
	This proliferation of choices has fueled research into neural architecture search (NAS), which casts the discovery of new architectures as an optimization problem	Introduction					e
	This has resulted in state of the art performance in the domain of image classification (Zoph et al., 2018; Real et al., 2018; Huang et al., 2018), and has shown promising results in other domains, such as sequence modeling (Zoph & Le, 2016; So et al., 2019).	Introduction							i														e											e
	Unfortunately, NAS research is notoriously hard to reproduce (Li & Talwalkar, 2019; Sciuto et al., 2019).	Introduction
	First, some methods require months of compute time (e.g., Zoph et al., 2018), making these methods inaccessible to most researchers	Introduction																																	i
	Second, while recent improvements (Liu et al., 2018a; Pham et al., 2018; Liu et al., 2018b) have yielded more efficient methods, different methods are not comparable to each other due to different training procedures and different search spaces, which make it difficult to attribute the success of each method to the search algorithm itself.	Introduction																																	e													i
	To address the issues above, this paper introduces NASBench-101, the first architecture-dataset for NAS.	Introduction					e
	This enables NAS experiments to be run via querying a table instead of performing the usual costly train and evaluate procedure.	Introduction																			e														e					i
	Moreover, the data, search space, and training code is fully public 1 , to foster reproducibility in the NAS community.	Introduction
	Because NAS-Bench-101 exhaustively evaluates a search space, it permits, for the first time, a comprehensive analysis of a NAS search space as a whole.	Introduction					e
	We illustrate such potential by measuring search space properties relevant to architecture search.	Introduction														i
	Finally, we demonstrate its application to the analysis of algorithms by benchmarking a wide range of open source architecture/hyperparameter search methods, including evolutionary approaches, random search, and Bayesian optimization.	Introduction								e
	We introduce NAS-Bench-101, the first large-scale, open source architecture dataset for NAS (Section 2);	Introduction			does open source fit into "Facilitating use (e.g. sharing code)"		e
	We illustrate how to use the dataset to analyze the nature of the search space, revealing insights which may guide the design of NAS algorithms (Section 3);	Introduction																																														i
	We illustrate how to use the dataset to perform fast benchmarking of various open-source NAS optimization algorithms (Section 4).	Introduction			fast aligns with efficient																														e
	Recent advances in neural architecture search (NAS) demand tremendous computational resources, which makes it difficult to reproduce experiments and imposes a barrier-to-entry to researchers without access to large-scale computation	Abstract																				e													i									i
	We aim to ameliorate these problems by introducing NAS-Bench-101, the first public architecture dataset for NAS research.	Abstract					e
	We trained and evaluated all of these architectures multiple times on CIFAR-10 and compiled the results into a large dataset of over 5 million trained models.	Abstract														i
	This allows researchers to evaluate the quality of a diverse range of models in milliseconds by querying the precomputed dataset	Abstract								i																									i
	To justify the approximation above, we performed a study on a different set of NAS-HPO-Bench (Klein & Hutter, 2019) datasets (described in detail in Supplement S5) T	Discussion														e
	This let us compute the exact hyperparameteroptimized accuracy,	Discussion																									e					e
	To do this, we chose a set of hyperparameters H† by optimizing the mean accuracy across all of the architectures for a given dataset.	Discussion																														e
	This allows us to map each architecture A to its approximate hyperparameteroptimized accuracy	Discussion																														e
	The choice of search space, hyperparameters, and training techniques were designed to ensure that NAS-Bench-101 would be feasible to compute with our resources.	Discussion																																	i
	Unfortunately, this means that the models we evaluate do not reach current state-of-the-art performance on CIFAR-10.	Discussion																													e			e
	We introduced NAS-Bench-101, a new tabular benchmark for neural architecture search that is inexpensive to evaluate but still preserves the original NAS optimization problem, enabling us to rigorously compare various algorithms quickly and without the enormous computational budgets often used by projects in the field	Conclusion					e														i														i
	Based on the data we generated for this dataset, we were able to analyze the properties of an exhaustively evaluated set of convolutional neural architectures at unprecedented scale.	Conclusion																				e
	In open-sourcing the NAS-Bench-101 data and generating code, we hope to make NAS research more accessible and reproducible.	Conclusion
							7	0	1	2	0	0	0	0	0	3	0	0	0	0	2	2	1	0	0	0	1	0	0	0	1	3	0	2	8	0	0	0	0	1	0	0	0	1	0	0	0	2	0
DISCUSSION OF NEGATIVE POTENTIAL
To what extent does the paper engage with negative potential? 0=Doesn't mention negative potential 1=Only mentions negative potential 2=Discusses negative potential 3=Deepens our understanding of negative potential				0
If >0, does the paper call for technical improvement or questioning?				no
[truncated: 42 more columns]

[truncated: 100 more sheets: 10, 11, 12, 13, 14, 15, 16, 17, 18, 19, 20, 21, 22, 23, 24, 25, 26, 27, 28, 29 …]
